# Supplementary material
Source: HighWire-hosted journal article supplement (http://www.qdcxjkg.com/highwire/filestream/113606/field_highwire_adjunct_files/0/Figure.pdf)
Supplement: Figure.pdf [file Figure.pdf]

Figure 3: Schematic representation of RCT outcomes

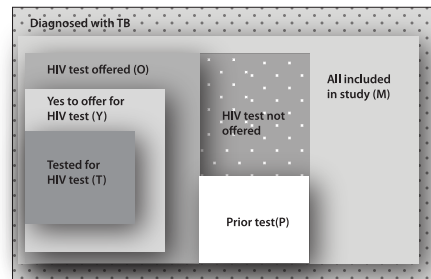

$$\text{Offer} = \frac{O+P}{M}$$

$$\text{Acceptance} = \frac{T}{Y}$$

$$\text{Coverage} = \frac{T+P}{M}$$
